# Supplementary material
Source: PubMed Central journal article supplement (PMC6886701)
Supplement: NIHMS1060122-supplement-Tables.pdf [file NIHMS1060122-supplement-Tables.pdf]

**Appendix**  
**Economics of Multicomponent Interventions to Increase Breast, Cervical, and Colorectal Cancer Screening:**  
**A Community Guide Systematic Review**  
**Mohan et al.**

**Appendix Table 1.** Intervention Definitions

| <b>Interventions to increase...</b>    | <b>Definition</b>                                                                                                                                                                                                                                                                                                                                                                                                                                                                                                                                                                                                                                            |
|----------------------------------------|--------------------------------------------------------------------------------------------------------------------------------------------------------------------------------------------------------------------------------------------------------------------------------------------------------------------------------------------------------------------------------------------------------------------------------------------------------------------------------------------------------------------------------------------------------------------------------------------------------------------------------------------------------------|
| <b>Community demand</b>                |                                                                                                                                                                                                                                                                                                                                                                                                                                                                                                                                                                                                                                                              |
| Client reminders (CR)                  | Textual (letter, postcard, e-mail) or telephone messages advising people that they are due (reminder) or overdue (recall) for screening.                                                                                                                                                                                                                                                                                                                                                                                                                                                                                                                     |
| Client incentives (CI)                 | Small, non-coercive rewards (e.g., cash or coupons) to motivate people to seek cancer screening for themselves or to encourage others (e.g., family members, close friends) to seek screening.                                                                                                                                                                                                                                                                                                                                                                                                                                                               |
| Small media (SM)                       | Includes videos or printed materials (e.g., letters, brochures, pamphlets, flyers, or newsletters).                                                                                                                                                                                                                                                                                                                                                                                                                                                                                                                                                          |
| Mass media (MM)                        | Including television, radio, newspapers, magazines, and billboards – is used to communicate educational and motivational information in community or larger-scale intervention campaigns.                                                                                                                                                                                                                                                                                                                                                                                                                                                                    |
| One-on-one education (OE)              | Conveys information to individuals by telephone or in person about indications for, benefits of, and ways to overcome barriers to screening with the goal of informing, encouraging, and motivating people to seek recommended screening.                                                                                                                                                                                                                                                                                                                                                                                                                    |
| Group education (GE)                   | Conveys information to groups about indications for, benefits of, and ways to overcome barriers to screening with goals of informing, encouraging, and motivating participants to seek recommended screening.                                                                                                                                                                                                                                                                                                                                                                                                                                                |
| <b>Community access</b>                |                                                                                                                                                                                                                                                                                                                                                                                                                                                                                                                                                                                                                                                              |
| Reducing structural barriers (RSB)     | Interventions are designed to reduce non-economic burdens or obstacles that impede access to screening. Such interventions may facilitate access by reducing time or distance between service delivery settings and target populations; modifying hours of service to meet client needs; offering services in alternative or non-clinical settings (e.g., mobile mammography vans at worksites or in residential communities); and eliminating or simplifying administrative procedures and other obstacles (e.g., scheduling assistance or patient navigators, transportation, dependent care, translation services, limiting the number of clinic visits). |
| Reducing out-of-pocket costs (ROPC)    | Interventions attempt to minimize or remove economic barriers that impede client access to cancer screening services. Costs can be reduced through a variety of approaches, including vouchers, reimbursements, reduction in co-pays, or adjustments in federal or state insurance coverage.                                                                                                                                                                                                                                                                                                                                                                 |
| <b>Provider delivery</b>               |                                                                                                                                                                                                                                                                                                                                                                                                                                                                                                                                                                                                                                                              |
| Provider reminder (PR)                 | Reminder and recall systems inform those who deliver health services that individual clients are due (reminder) or overdue (recall) for specific cancer screening tests.                                                                                                                                                                                                                                                                                                                                                                                                                                                                                     |
| Provider incentives (PI)               | Direct and indirect rewards intended to motivate providers to perform cancer screening or make appropriate referral for their patients to receive these services.                                                                                                                                                                                                                                                                                                                                                                                                                                                                                            |
| Provider assessment and feedback (PAF) | Interventions both evaluate provider performance in offering and/or delivering screening to clients (assessment) and present providers with information about their performance in providing screening services (feedback).                                                                                                                                                                                                                                                                                                                                                                                                                                  |

**Appendix Table 2.** Literature Search Strategy for Scopus (One Database per PRISMA Guidelines)

**Database: Scopus**

**Search Strategy:**

#1

TITLE-ABS-KEY (economic\* OR cost OR costs OR qaly OR dollar OR dollars OR utility OR efficiency)

#2

TITLE-ABS-KEY (“breast neoplasm” OR “breast neoplasms” OR “rectal neoplasm” OR “rectal neoplasms” OR “colorectal neoplasms” OR “ductal carcinoma” OR “uterine cervical neoplasms” OR “breast cancer” OR “breast tumor” OR “breast tumors” OR “colon cancer” OR “rectal cancer” OR “cervical cancer” OR “cervix cancer” OR “uterus cancer” OR “uterine cancer” OR “uterine cancers” OR “colorectal cancer”)

#3

TITLE (adenoma\* OR neoplasia OR cancer\* OR neoplasm\* OR tumor\* OR carcinoma\* OR adenocarcinoma\*) AND TITLE (breast OR cervical OR cervix OR colon OR colorectal OR crc)

#4

#2 OR #3

#5

TITLE-ABS-KEY (screen OR screens OR screened OR screening\* OR “early detection”)

#6

#4 AND #5

#7

#8

TITLE-ABS-KEY (“vaginal smears” OR “vaginal smear” OR “pap smear” OR “pap smears” OR “pap test” OR “pap tests” OR “pap testing” OR papanicolaou)

#9

TITLE-ABS-KEY (colonography OR colonoscopy OR gastrointestinal AND endoscopy OR sigmoidoscopy OR “occult blood”) AND TITLE-ABS-KEY (feces AND faeces OR fecal OR faecal OR colorectal)

#10

#6 OR #8 OR #9

#11

#1 AND #10

#12

TITLE-ABS-KEY (“health knowledge” OR “patient acceptance” OR “patient compliance” OR “patient participation” OR “health promotion” OR “healthy people” OR “health education” OR “patient education” OR “education as topic” OR “persuasive communication” OR accept OR acceptance OR adhere OR adherence OR compliance OR compliant OR persuad\* OR education OR rescreen\* OR reminder\* OR prompt\* OR appointment\* OR schedul\* OR insurance OR cost OR costs OR costing OR financing OR “managed care” OR “health benefit plan” OR “health maintenance” OR medicare OR medicaid OR complimentary OR copay\* OR “co-pay” OR coupon\* OR coverage OR covers OR cover OR covering OR covered OR free OR fee OR fees OR indigent\* OR subsidize\* OR subsidy OR subsidies OR uncompensated OR voucher\* OR “employer provided” OR “low income” OR “delivery of health care” OR “after hours” OR

**Appendix**  
**Economics of Multicomponent Interventions to Increase Breast, Cervical, and Colorectal Cancer Screening:**  
**A Community Guide Systematic Review**  
**Mohan et al.**

“health services access” OR “health services accessibility” OR onsite OR “on site” OR “health care access” OR “healthcare access” OR contract\* OR insure OR uninsured OR insured OR “health reform” OR “health reforms” OR “health care reform” OR “healthcare reform” OR “health policy” OR “health policies” OR “healthcare policy” OR “health care policy” OR “care policies” OR “health care reform” OR “quality assurance” OR “clinical audit” OR “medical audit” OR “public health improvement” OR “continuous quality improvement” OR audit\* OR incentive\* OR standards OR quality OR policy OR policies OR organization\* OR institution\* OR commitment\* OR communication\* OR media OR radio OR television OR internet OR blog OR blogs OR blogging OR video OR videos OR telecommunication\* OR “electronic mail” OR “email” OR “e-mail” OR “text messaging” OR “text message” OR “text messages” OR computer\* OR microcomputer\* OR cyberspace OR “health 2.0” OR avatar OR wiki OR wikipedia OR weblog\* OR microblog\* OR “short message service” OR sms OR “mobile app” OR iphone OR ipad OR ipod OR xbox OR “x-box” OR nintendo OR instagram OR orkut OR flicker OR foursquare OR snapchat OR wii OR ddr OR advergam\* OR “mobile phone” OR “cell phone” OR handheld OR “hand-held” OR “web based learning” OR “health knowledge” OR “patient acceptance” OR “patient compliance” OR “patient participation” OR “health promotion” OR “healthy people” OR “health education” OR “patient education” OR “education as topic” OR “persuasive communication” OR accept OR acceptance OR adhere OR adherence OR compliance OR compliant OR persuad\* OR education OR rescreen\* OR reminder\* OR prompt\* OR appointment\* OR schedul\* OR insurance OR cost OR costs OR costing OR financing OR “managed care” OR “health benefit plan” OR “health maintenance” OR medicare OR medicaid OR complimentary OR copay\* OR “co-pay” OR coupon\* OR coverage OR covers OR cover OR covering OR covered OR free OR fee OR fees OR indigen\* OR subsidize\* OR subsidy OR subsidies OR uncompensated OR voucher\* OR “employer provided” OR “low income” OR “delivery of health care” OR “after hours” OR “health services access” OR “health services accessibility” OR onsite OR “on site” OR “health care access” OR “healthcare access” OR contract\* OR insure OR uninsured OR insured OR “health reform” OR “health reforms” OR “health care reform” OR “healthcare reform” OR “health policy” OR “health policies” OR “healthcare policy” OR “health care policy” OR “care policies” OR “health care reform” OR “quality assurance” OR “clinical audit” OR “medical audit” OR “public health improvement” OR “continuous quality improvement” OR audit\* OR incentiv\* OR standards OR quality OR policy OR policies OR organization\* OR institution\* OR commitment\* OR communication\* OR media OR radio OR television OR internet OR blog OR blogs OR blogging OR video OR videos OR telecommunication\* OR “electronic mail” OR “email” OR “e-mail” OR “text messaging” OR “text message” OR “text messages” OR computer\* OR microcomputer\* OR cyberspace OR “health 2.0” OR avatar OR wiki OR wikipedia OR weblog\* OR microblog\* OR “short message service” OR sms OR “mobilel app” OR iphone OR ipad OR ipod OR xbox OR “x-box” OR nintendo OR instagram OR orkut OR flicker OR foursquare OR snapchat OR wii OR ddr OR advergam\* OR “mobile phone” OR “cell phone” OR handheld OR “hand-held” OR “web based learning” OR listserv\* OR “world wide web” OR advertis\* OR apps OR app OR “automated voice” OR billboard\* OR “chat room” OR “chat rooms” OR commercial\* OR dvd OR dvds OR “dvd’s” OR infotainment OR “educational entertainment” OR facebook OR googleplus OR “google+” OR linkedin OR myspace OR toolkit\* OR “virtual reality” OR online OR pinterest OR “pod cast” OR “pod casts” OR podcast\* OR psa OR psas OR “public service” OR push OR pushed OR pushing OR content OR reddit OR smartphone\* OR “smart phone” OR “smart phones” OR message\* OR messaging OR network\* OR tumblr OR tweet\* OR twitter\*

**Appendix**  
**Economics of Multicomponent Interventions to Increase Breast, Cervical, and Colorectal Cancer Screening:**  
**A Community Guide Systematic Review**  
**Mohan et al.**

OR vine OR vines OR vlog\* OR web OR social OR webinar\* OR website\* OR “you tube” OR youtube OR friending OR wireless OR “new technology” OR conversation\* OR “community health worker” OR “community health workers” OR chw OR “health worker” OR “health workers” OR consejera\* OR “patient navigator” OR “patient navigators” OR outreach\* OR embajador\* OR “health advocacy” OR “health advocate” OR “health advocates” OR “patient navigation” OR “community health” OR indigenous OR “link worker” OR “link workers” OR peer OR peers OR “allied health” OR “community based” OR “lay health” OR “skilled health” OR attendant\* OR wraparound OR “wrap around” OR access\* OR beauty OR occupational OR checklist\* OR cosmetolog\* OR employee\* OR expand\* OR hours OR clinic OR clinics OR resident\* OR doctor\* OR nurse\* OR multicomponent OR mobile OR feedback OR “hair dressers” OR hairdresser\* OR law OR laws OR incremental OR intervention\* OR multilevel OR multiphas\* OR outreach OR provider\* OR physician\* OR salon OR saturday OR schedul\* OR transportation OR transported OR transporting OR weekend OR “week end” OR “work place” OR workplace OR “work site” OR worksite\*)

#13

#11 AND #12

#14

LIMIT-TO (PUBYEAR , 2017) OR LIMIT-TO (PUBYEAR , 2016) OR LIMIT-TO (PUBYEAR , 2015) OR LIMIT-TO (PUBYEAR , 2014) AND LIMIT-TO (LANGUAGE , “English”)

#15

#13 AND #14
